# Supplementary material
Source: PubMed Central journal article supplement (PMC4224183)
Supplement: 4c75dad4fd41323d9680b2079437f2ff_genetics.114.170340-1.pdf [file 4c75dad4fd41323d9680b2079437f2ff_genetics.114.170340-1.pdf]

Figure S3

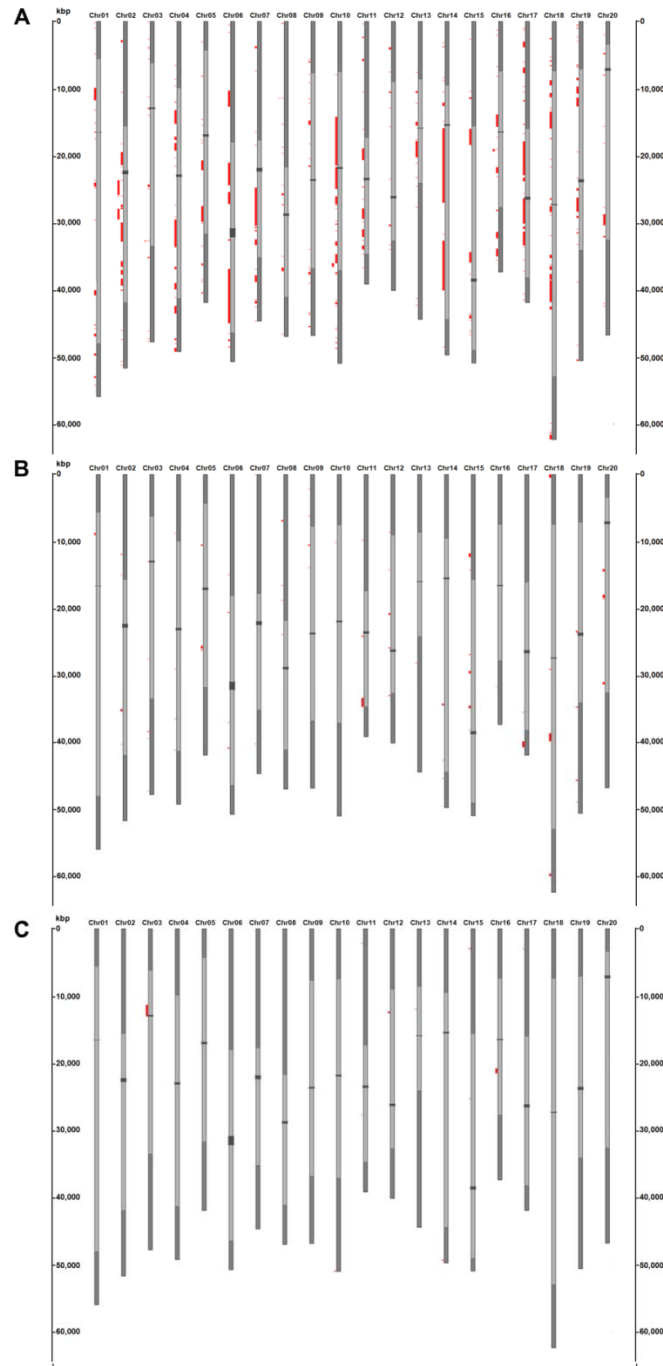

**Figure S3** Genome-wide view of homozygous deletion coverage detected in fast neutron-irradiated soybean mutants for each selection category. Light gray lines indicate pericentromeric regions while euchromatic and centromeric regions are shown in dark gray. Homozygous deletion events are shown as red bars, detected in plants from the Forward Screen (A), No-Phenotype (B), and the Reverse Screen (C) classes.
