# Supplementary material
Source: PubMed Central journal article supplement (PMC4224183)
Supplement: 6cbdfd1143c4d8fb4fe293bb643f1def_genetics.114.170340-10.pdf [file 6cbdfd1143c4d8fb4fe293bb643f1def_genetics.114.170340-10.pdf]

Figure S7

**A**

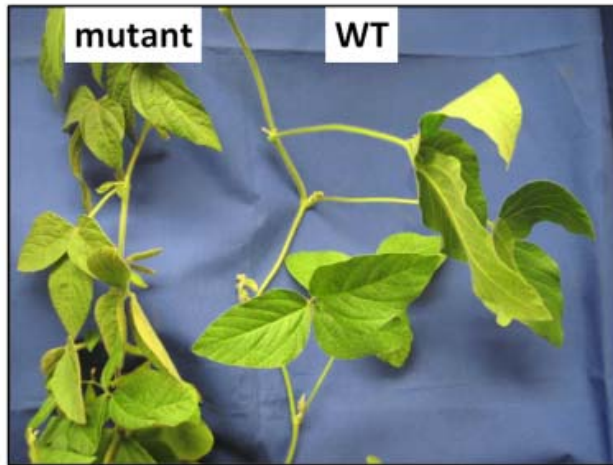

**B**

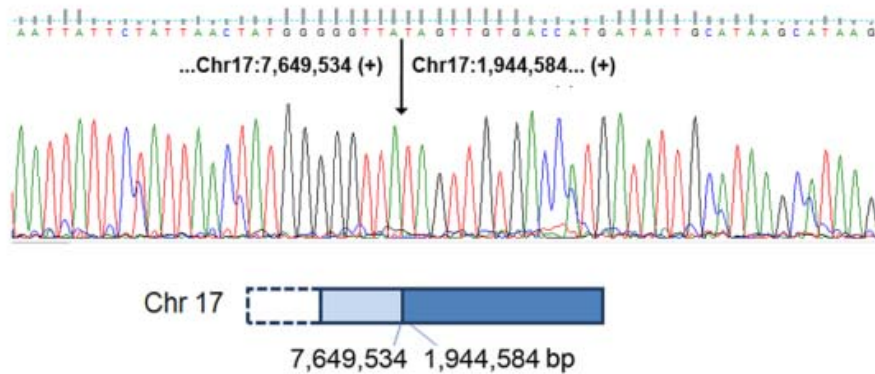

**Figure S7** Phenotype and sequence analysis of mutant FN0163764. (A) A photograph of representative mutant vs. wild-type plants show the shorter petiole lengths in the FN0163764 mutant. (B) Sequencing evidence for the tandem duplication junction on chromosome 17 in the short petiole FN0163764 mutant.
