# Supplementary material
Source: PubMed Central journal article supplement (PMC4224183)
Supplement: 8bfe162490c0fb25b5c43e031af24ced_genetics.114.170340-8.pdf [file 8bfe162490c0fb25b5c43e031af24ced_genetics.114.170340-8.pdf]

Figure S2

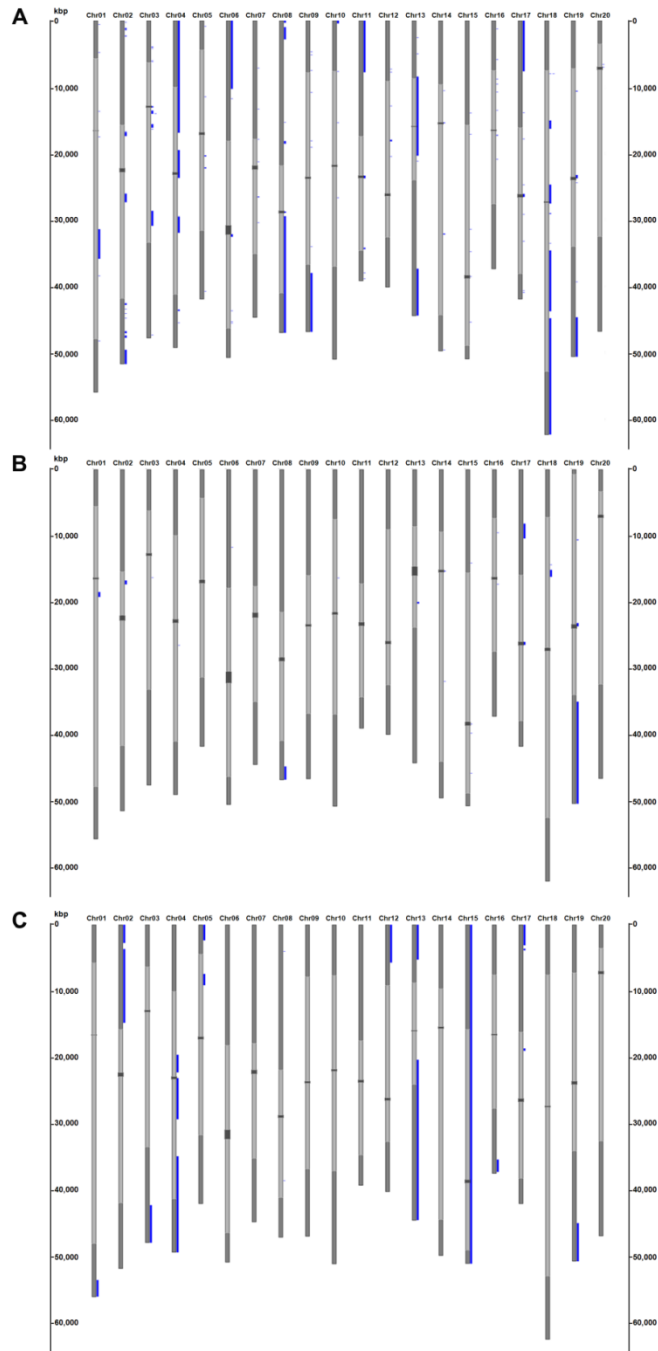

**Figure S2** Genome-wide view of segmental duplication coverage detected in fast neutron-irradiated soybean mutants for each selection category. Light gray lines indicate pericentromeric regions while euchromatic and centromeric regions are shown in dark gray. Segmental duplication events are shown as blue bars, detected in plants from the Forward Screen (A), No-Phenotype (B), and the Reverse Screen (C) classes.
