# Supplementary material
Source: PubMed Central journal article supplement (PMC4224183)
Supplement: 03209e8585bb51ff6447d80aff489b91_genetics.114.170340-5.pdf [file 03209e8585bb51ff6447d80aff489b91_genetics.114.170340-5.pdf]

Figure S6

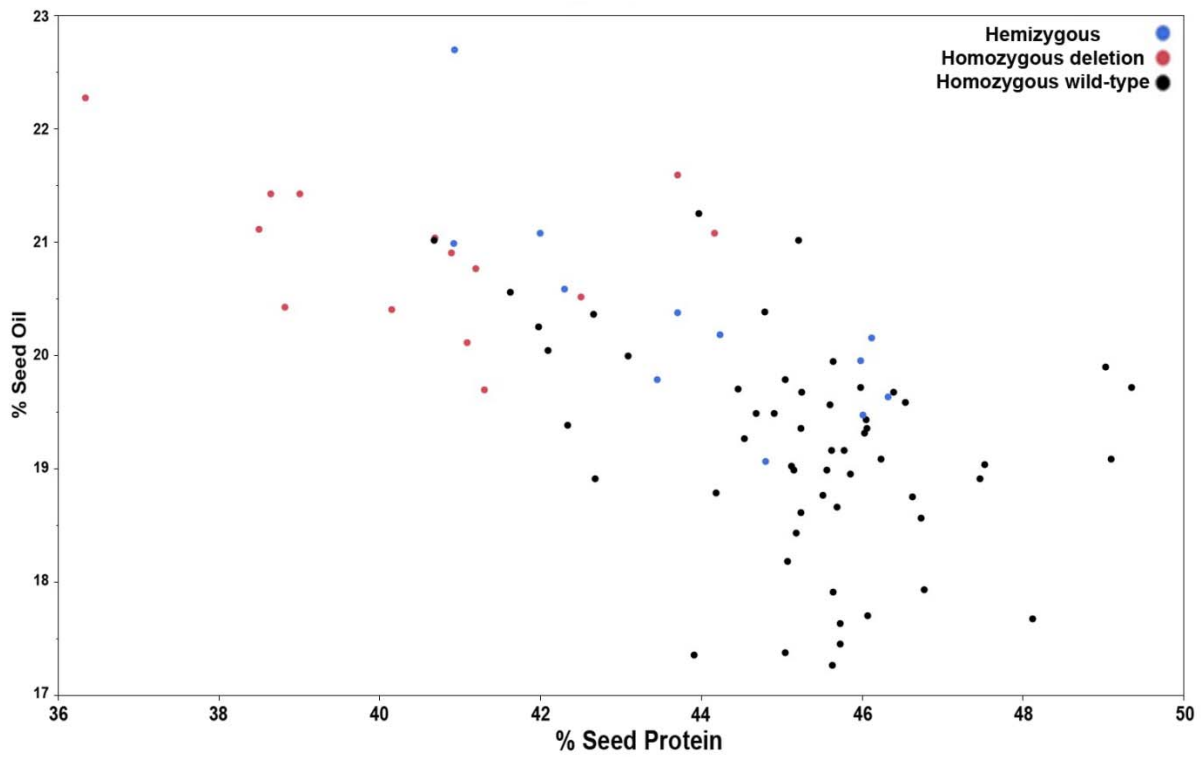

**Figure S6** Scatter plot representation of a genetic association of a  $\sim 1.3$  Mb deletion in mutant FN0172932 with quantitative changes in seed composition. Individual  $BC_1F_3$  plants are represented by color code for the presence of the wild-type allele (black) and homozygous (red) or hemizygous (blue) deletion allele on chromosome 10 and graphed on a percent oil by percent protein basis.
