# Supplementary material
Source: PubMed Central journal article supplement (PMC4224183)
Supplement: ab9a7c3c257ffa7dc69b2abfdd5c9572_genetics.114.170340-4.pdf [file ab9a7c3c257ffa7dc69b2abfdd5c9572_genetics.114.170340-4.pdf]

Figure S1

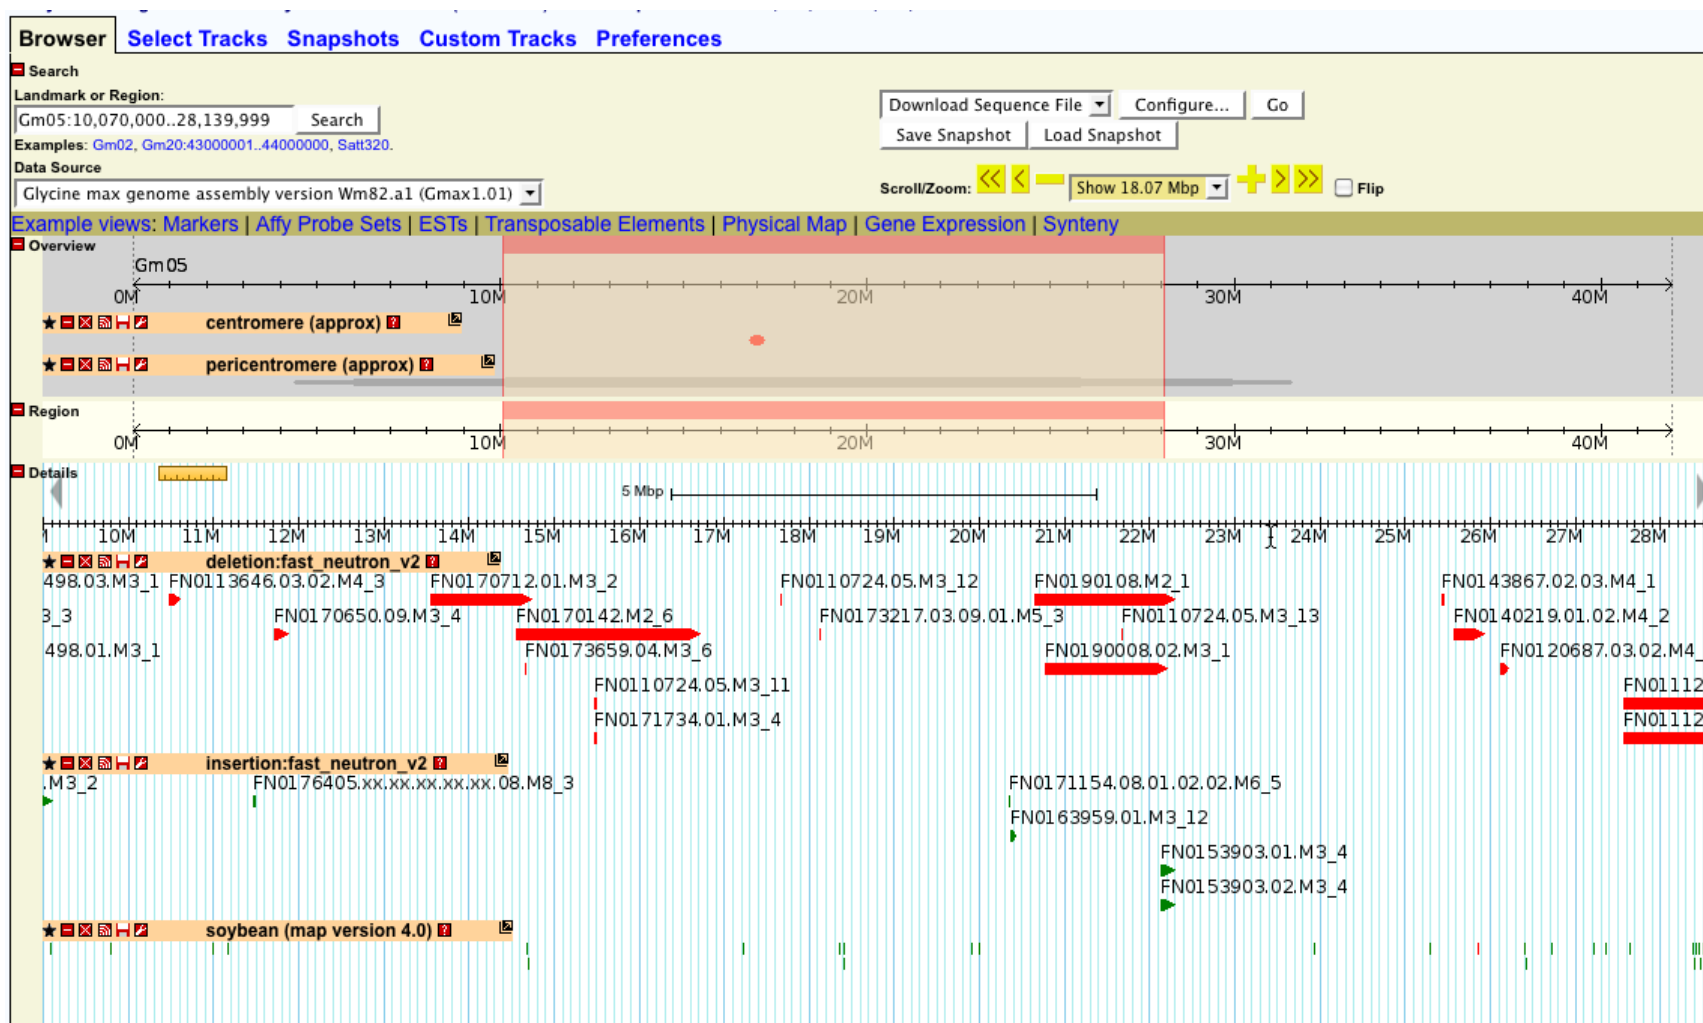

**Figure S1** Example genome browser view of fast neutron mutant duplication and deletion coverage. Data from this study is available on the online browser at [www.soybase.org](http://www.soybase.org).
