# Supplementary material
Source: PubMed Central journal article supplement (PMC4224183)
Supplement: b0a72614b3ce4af21daeab703a2221f6_genetics.114.170340-6.pdf [file b0a72614b3ce4af21daeab703a2221f6_genetics.114.170340-6.pdf]

Figure S4

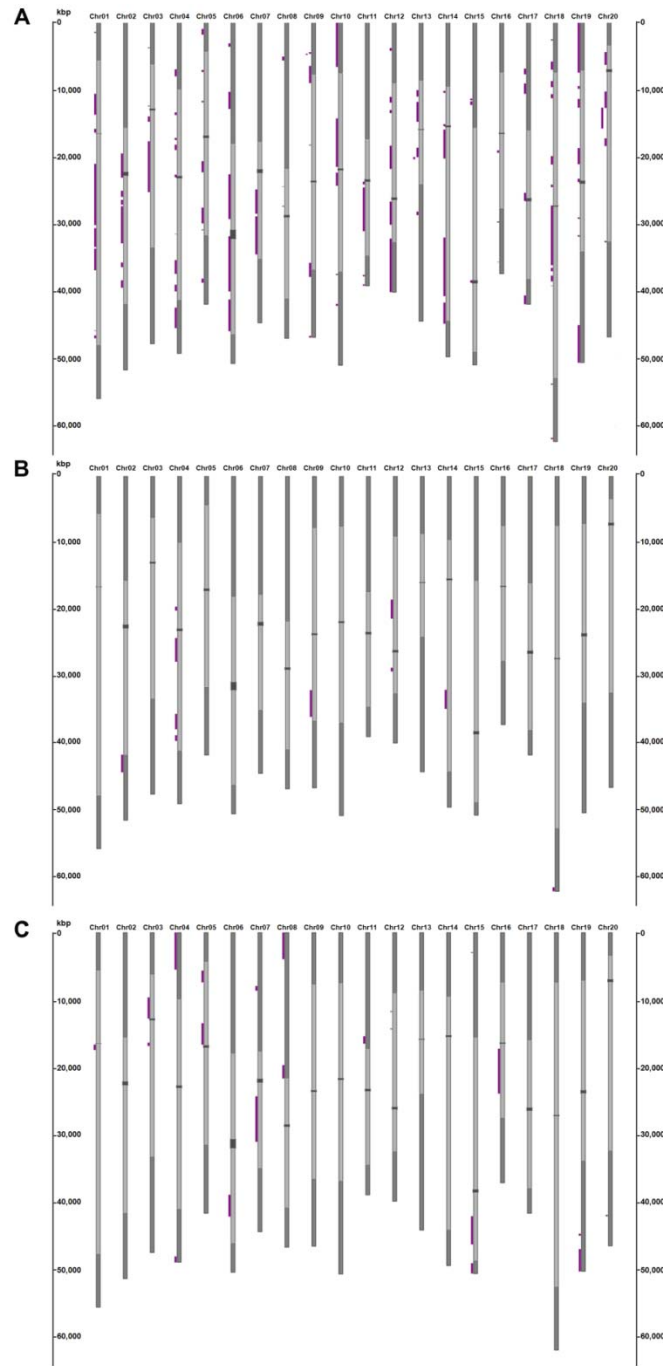

**Figure S4** Genome-wide view of hemizygous deletion coverage detected in fast neutron-irradiated soybean mutants for each selection category. Light gray lines indicate pericentromeric regions while euchromatic and centromeric regions are shown in dark gray. Hemizygous deletion events are shown as purple bars, detected in plants from the Forward Screen (A), No-Phenotype (B), and the Reverse Screen (C) classes.
